# Supplementary material for: Bmp Signaling Regulates Hand1 in a Dose-Dependent Manner during Heart Development
Source: MDPI journal article supplement (doi:10.3390/ijms22189835), 2021-09-11
Supplement: s1 [file s1]

## Supplementary information

# Bmp signaling regulates Hand1 in a dose-dependent manner during heart development

Mingjie Zheng <sup>1</sup>, Shannon Erhardt <sup>1,2</sup>, Di Ai<sup>3</sup> and Jun Wang <sup>1,2,\*</sup>

1 Department of Pediatrics, McGovern Medical School, The University of Texas Health Science Center at Houston, Houston, TX, 77030, United States; mingjie.zheng@uth.tmc.edu (M.Z.), shannon.erhardt@uth.tmc.edu (S.E.), jun.wang@uth.tmc.edu (J.W.)

2 Graduate School of Biomedical Sciences, The University of Texas MD Anderson Cancer Center and The University of Texas Health Science Center at Houston, Houston, TX, 77030, United States; shannon.erhardt@uth.tmc.edu (S.E.), jun.wang@uth.tmc.edu (J.W.)

3 Department of Pathology and Laboratory Medicine, Emory University, Atlanta, GA, 30322, United States; di.ai@emory.edu (D.A.)

\*Correspondence: Jun Wang; jun.wang@uth.tmc.edu

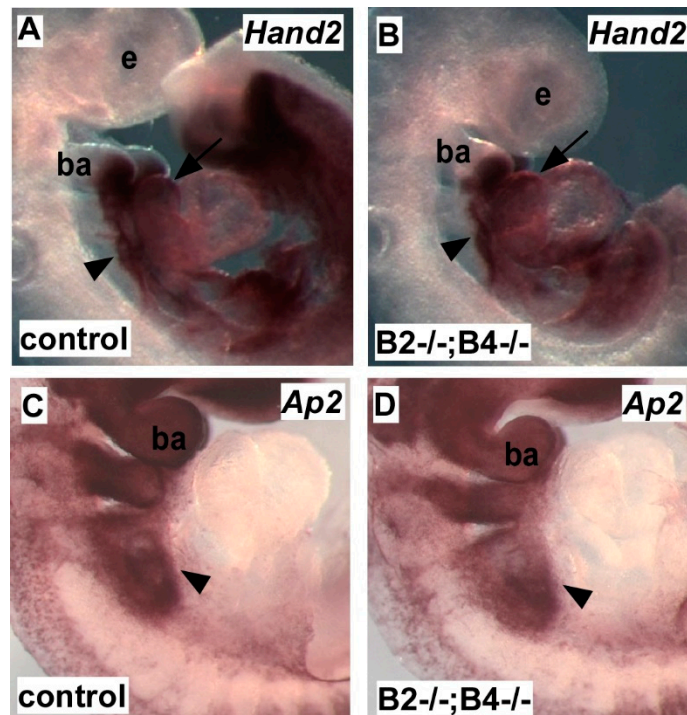

**Figure S1.** *Hand2* is not changed in control and *Bmp2/4* mutant. (A, B) Whole-mount in situ hybridization at E9.5 embryo showing *Hand2* expression (arrows and arrow heads). (C, D) Whole-mount in situ hybridization at E9.5 embryo showing *Ap2* expression (arrow heads). e, eye; ba, branchial arch.

- GCCG core consensus in GC-rich sequences
- Smad4 recognized Smad binding element (SBE) motif
- BMP-responsive element (BRE)

location on Chromosome 11 (Ensembl)

```

11:57647580 TAAGGTGGAAGACATCTGTAAGAACACCACGCCGGTGTTTGTGTGTGCCGGCGAAGGGAT
11:57647520 GAGCCTGTGTATATGTATGGACCTGTCATGGAGTCCAGGATGAAGACTGCTGGAGTCAGA
11:57647460 ACTGTGCTGTCTTGAGAATCCAGGCCCTTTCCACCCAGGTTCCCTCATTCTGAGAGTGAC
11:57647400 TCCCAACCCGCAGGGCACAAGAACCCGCGGAGCAGCTGCGCAGCTGCGGAACCGCCGCT
11:57647340 TCCCGGGGAGCCTTCCCCAGGCCCTGGCTGAGCCCAACCCAGCGCTGCGGGCGCCAGG
11:57647280CGCCTGCAAAAGCAGCGGGTTCCAGTTCGCCTGGGGCAGGAAAGTGAGGTTCTCCGGAT
11:57647220 CTCTTTCCACTGCCGCTCACAATCTCTTGCAACAACCAAGTTCTCACAGGTGGGACCTTGGG
11:57647160 GCTCAGACCTCAGCGACTGAGCTTCCATCCACGCCCTCAAAGCGAGATTACTCTCACAGAC
11:57647100 ACGCAGAAATCACAATTTCGCACACATTCCTAGGATTTACACACAGGGACTGTCATCTGT
11:57647040 TGAGCCACGACCTACTCCACATTCGTTTTCACTTACCCACTTGCTACTGGGCCTCACAT
11:57646980 CCCGTCTGCGCACGGTGGCCTCTCTCCCACTGTCCCTGCCTGGTAATTGTCTTACACAAG
11:57646920 CTGGGCCTCAGCGAGCAACTTTTCGAGTGGCTGGATCAGAAGCGAATTAAGAATTTGA
11:57646860 CATCATCTCATTTCCTTAACTGACATTTGATAGGCACAAGCCCACCTAGGGAAGGA
11:57646800 GCGAGACCAGAAATGTTGGTGAGGATGGAGGGGTCCTAGGGACAGGGACCTTAATGAAA
11:57646740 AGATGAAGAAGACCCAGAGTTTCAAGCTTAAAGCCTGGTCTCCCACGTTCTTATCAACT
11:57646680 CTTGGAAAGCCATCTCTTTGTGGAATCCACCTTGGAGAATCTAGGCTGATGGGAGCAA
11:57646620 CACAAGGTTGCACAGATATTCCTGCCTCAGCAGAGTGAGTGTGAAGCGCCTAGGCTGTT
11:57646560 TCTCCGTGGATATCAGGGGTGGGGGTGGGCTGGTTTCTTCCAGTGTGAGCCTCAGTGGAA
11:57646500 GTATCTTTATAGGATCAAAGATTTTCATGCAGGTGGCGAGCCAGATGGAGTGAGCAGCCC
11:57646440 AGCAGTCGCCGGCTCCTTAGCCCTACGTGCGAATCTTCCGAAGACACCGGGGAGTCCTGC
11:57646380 CACAGAGATGCCTTGGGGCCAAGGCGCCGCCAGGCTGCCTCGCCACCAGCTCAGCCTGCC
11:57646320 GGCGTTTACACCGAACCAGGCGCCTGAGAGGCTAGAGGAGCAGAGATCAGCCACCGTCTC
11:57646260 CACCCCCAACCCCCAAGCCCGGAACAAACTGGTCAGTGCCCAAGAGCTGGAAGCCCCGCT

```

**Figure S2.** Diagram of the Bmp/Smad regulatory element in the 5' upstream of *Hand1* genomic sequence (at upper) and its phylogenetic sequence alignment (at lower).
